# Supplementary material for: European Markets for Cultured Meat: A Comparison of Germany and France
Source: MDPI journal article supplement (doi:10.3390/foods9091152), 2020-08-21
Supplement: s1 [file s1]

## CLEAN MEAT SURVEY

ASK ALL.

QUOTA

### S1. BIRTHDAY [Year/Month]

What is your date of birth?

YEAR/MONTH DROPDOWN

ASK ALL. SINGLE.

### S2. GENDER

QUOTA

Are you?

1. Male
2. Female

ASK ALL

### S3. REGION

QUOTA

Where do you live?

## INTRODUCTION

Thank you for taking part in this survey.

The survey will take around 15 minutes. Your opinion is very important to us because your answers will help us understand how people in different countries think about various topics. Therefore, we would like to ask you to answer the questions without interruption, if possible.

Your participation is voluntary. Your answers will be treated completely anonymously and confidentially and will only be analyzed for statistical purposes.

Please click on “next” to start the survey.

## MAIN QUESTIONNAIRE

ASK ALL. SINGLE

### Q1. SENSITIVITY ENVIRONMENT

Please indicate how much you agree with the following statement: I feel concerned about environmental issues.

- 1 Completely agree
- 2 Agree
- 3 Neither agree nor disagree
- 4 Disagree
- 5 Completely disagree
- 97 Don't know/ Prefer not to say

ASK ALL. SINGLE

### Q2. SENSITIVITY ANIMAL WELFARE

Please indicate how much you agree with the following statement: I feel concerned about animal welfare.

- 1 Completely agree
- 2 Agree
- 3 Neither agree nor disagree

- 4 Disagree
- 5 Completely disagree
- 97 Don't know/ Prefer not to say

**ASK ALL. SINGLE**

**Q3. SENSITIVITY WORLD HUNGER**

Please indicate how much you agree with the following statement: I feel concerned about food security / world hunger.

- 1 Completely agree
- 2 Agree
- 3 Neither agree nor disagree
- 4 Disagree
- 5 Completely disagree
- 97 Don't know/ Prefer not to say

**ASK ALL. SINGLE**

**Q4. SENSITIVITY FOOD SAFETY HEALTH**

Please indicate how much you agree with the following statement: I feel concerned about the safety of food products for my own health (ex: contamination of food by pathogens).

- 1 Completely agree
- 2 Agree
- 3 Neither agree nor disagree
- 4 Disagree
- 5 Completely disagree
- 97 Don't know/ Prefer not to say

**Show all**

**Q5 Infotext**

Please have a look at the following definitions of diet types.

- Omnivore (Eats meat, fish/seafood, eggs, dairy etc)
- Flexitarian (Limits the consumption of meat and/or fish/seafood)
- Pescatarian (Eats fish/seafood, eggs and dairy but no meat)
- Vegetarian (Does not eat meat or fish/seafood but eggs and dairy)
- Vegan (Does not eat meat, fish/seafood, dairy and eggs)

**ASK ALL. SINGLE**

**Q6. DIETARY IDENTITY**

After having read the definitions of diet types, how would you describe yourself?

- 1 Omnivore
- 2 Flexitarian
- 3 Pescatarian
- 4 Vegetarian
- 5 Vegan
- 97 Don't know/ Prefer not to say

**ASK IF Q6=1,2 (EATS MEAT). SINGLE**

**Q7. FREQUENCY MEAT CONSUMPTION**

How often do you consume meat (any type of meat including: beef, pork, chicken, turkey; in any form: steaks to sausages)? Think about all the meals and snacks you eat. Also think about everything you have at home or outside the home.

- 1 2 or more times per day
- 2 Once per day
- 3 5-6 times per week

- 4 2-4 times per week
- 5 Once per week
- 6 2-3 times per month
- 7 Once per month
- 8 Less than once per month

**ASK IF Q6=1,2 (EATS MEAT). SINGLE**

**Q8. INTENTION TO REDUCE MEAT**

Do you intend to reduce your consumption of meat?

- 1 Definitely yes
- 2 Probably yes
- 3 Unsure
- 4 Probably no
- 5 Definitely no
- 97 Don't know/ Prefer not to say

**ASK IF Q6=,3,4,5 OR Q8=1,2 (IS FLEXITARIAN, INTENDS TO REDUCE OR DOES NOT EAT MEAT).**

**MULTI**

**Q9. REASONS FOR REDUCING MEAT**

What are the reasons for not consuming meat, reducing or for having the intention to reduce your meat consumption? Please select all the answers that apply.

Meat...

**RANDOMIZE**

- 1 is expensive
- 2 is not animal welfare friendly
- 3 is not healthy
- 4 has a negative impact on the environment
- 5 is unsafe (antibiotics, contaminants in meat)
- 6 **FIX** I don't like meat
- 7 **FIX** Other

**Q10 SHOW ALL**

**INFO TEXT**

A few years ago, the first piece of meat was grown directly from cow cells, without slaughtering or even harming the animal. By sampling the cells which are responsible to renew muscle tissues and growing them under controlled conditions – it was proved that the same meat that grows inside the animal, can grow also outside of it. Food companies and universities around the world are currently working on perfecting the production method of this kind of meat, which is expected to reach your plate within the next 3 to 4 years.

**ASK ALL. OPEN**

**Q11. NOMENCLATURE**

Which name do you think would describe this meat?

... [\[open\]](#)

**ASK ALL. SINGLE**

**Q12. FAMILIARITY**

Had you heard of this kind of meat before?

- 1 No
- 2 Yes, but I didn't know what exactly it was
- 3 Yes, and I knew what it is

**ASK ALL. SINGLE**

**Q13. FAVOURABILITY OF PRODUCTION**

Are you in favor of the production of this cell-based type of meat, often called "cultured meat"?

- 1 Definitely in favor
- 2 Probably in favor
- 3 I am neither in favor, nor against
- 4 Probably against
- 5 Definitely against
- 97 Don't know/ Prefer not to say

**ASK ALL. SINGLE**

**Q14. WILLINGNESS TO TRY (AFTER INFO)**

Would you be willing to taste/ try cultured meat?

- 1 Definitely yes
- 2 Probably yes
- 3 Probably no
- 4 Definitely no
- 97 Don't know/ Prefer not to say

**ASK IF Q6=2-4 (DOES NOT EAT MEAT). SINGLE**

**Q15. WILLINGNESS INCORPORATE (VEG)**

Would you incorporate this meat into your diet?

- 1 Definitely yes
- 2 Probably yes
- 3 Probably no
- 4 Definitely no
- 97 Don't know/ Prefer not to say

**Show all**

**Q16 Infotext**

For the following questions, please assume that cultured meat has the same taste as conventional meat.

**ASK IF Q6=1,2 (EATS MEAT). SINGLE**

**Q17. WILLINGNESS TO PAY MORE (MEAT-EATERS)**

Would you be willing to pay a higher price for cultured meat than for conventional meat?

- 1 Yes
- 2 No
- 97 Don't know/ Prefer not to say

**ASK IF Q6=2-4 (DOES NOT EAT MEAT). SINGLE**

**Q18. WILLINGNESS TO PAY MORE (NON MEAT-EATERS)**

Would you be willing to pay a higher price for cultured meat than for f.ex. plant-based meat alternatives?

- 1 Yes
- 2 No
- 97 Don't know/ Prefer not to say

**ASK IF Q17=1 or Q18=1 (MEAT EATERS OR VEG\*ANS WHO WOULD PAY MORE)**

**Q19. AMOUNT TO PAY MORE**

What is the maximum price you would be willing to pay for a 100 grams piece of cultured meat, if for comparison, the cost of conventional meat was 1€ per 100 grams?

- 1 1,10 €

- 2 1,20 €
- 3 1,50 €
- 4 2,50 €
- 5 5,00 € or more
- 97 Don't know/ Prefer not to say

[Show all](#)

#### **Q20 Infotext**

For the following questions, please assume that cultured meat not only tastes like conventional meat but also that the price is the same.

#### **ASK ALL**

##### **Q21. WILLINGNESS TO BUY**

Would you be willing to buy cultured meat when available in stores?

- 1 Definitely yes
- 2 Probably yes
- 3 Unsure
- 4 Probably no
- 5 Definitely no
- 97 Don't know/ Prefer not to say

#### **ASK IF Q6=1,2 (EATS MEAT). SINGLE**

##### **Q22. WILLINGNESS TO REPLACE (GENERAL)**

Would you be willing to replace a part of your conventional meat with cultured in your daily diet?

- 1 Definitely yes
- 2 Probably yes
- 3 Unsure
- 4 Probably no
- 5 Definitely no
- 97 Don't know/ Prefer not to say

#### **ASK IF Q22=1,2 (WOULD REPLACE)**

##### **Q23. WILLINGNESS TO REPLACE (GMO)**

Would you be willing to replace a part of your conventional meat with cultured meat that was GENETICALLY MODIFIED/THAT CONTAINS GMOs, in your daily diet?

- 1 Definitely yes
- 2 Probably yes
- 3 Unsure
- 4 Probably no
- 5 Definitely no
- 97 Don't know/ Prefer not to say

#### **ASK IF Q22=1,2 (WOULD REPLACE)**

##### **Q24. WILLINGNESS TO REPLACE (NON-GMO)**

Would you be willing to replace a part of your conventional meat with cultured meat that was NOT GENETICALLY MODIFIED /THAT DOES NOT CONTAIN GMOs, in your daily diet?

- 1 Definitely yes
- 2 Probably yes
- 3 Unsure
- 4 Probably no

5 Definitely no  
97 Don't know/ Prefer not to say

**SHOW IF Q6=1,2 (EATS MEAT).**

**Q25. Infotext**

Please continue to assume that the taste and price for cultured meat are the same as for clean meat.

**ASK IF Q6=1,2 (EATS MEAT). SINGLE**

**Q26. PRESSURE POINT ENVIRONMENT**

Would knowing that cultured meat reduces the environmental impact of agriculture make you replace a part of your conventional meat with cultured meat?

- 1 It would definitely motivate me
- 2 It would probably motivate me
- 3 It would probably not motivate me
- 4 It would definitely not motivate me
- 97 Don't know/ Prefer not to say

**ASK IF Q6=1,2 (EATS MEAT). SINGLE**

**Q27. PRESSURE POINT ANIMAL WELFARE**

Would knowing that cultured meat doesn't involve the killing of an animal motivate you to replace a part of your conventional meat with cultured meat?

- 1 It would definitely motivate me
- 2 It would probably motivate me
- 3 It would probably not motivate me
- 4 It would definitely not motivate me
- 97 Don't know/ Prefer not to say

**ASK IF Q6=1,2 (EATS MEAT). SINGLE**

**Q28. PRESSURE POINT FOOD SAFETY**

Would knowing that cultured meat reduces the risk of contamination by pathogens motivate you to replace a part of your conventional meat with cultured meat?

- 1 It would definitely motivate me
- 2 It would probably motivate me
- 3 It would probably not motivate me
- 4 It would definitely not motivate me
- 97 Don't know/ Prefer not to say

**ASK IF Q6=1,2 (EATS MEAT). SINGLE**

**Q29. PRESSURE POINT ANTIBIOTICS**

Would knowing that no antibiotics are used in the production of cultured meat motivate you to replace a part of your conventional meat with cultured meat?

- 1 It would definitely motivate me
- 2 It would probably motivate me
- 3 It would probably not motivate me
- 4 It would definitely not motivate me
- 97 Don't know/ Prefer not to say

**ASK ALL. SINGLE**

**Q30. PREFERENCE OVER PLANT-BASED MEAT**

Would you rather eat cultured meat than plant-based (peas, seitan, soy, lentils) alternatives to meat?  
I would...

- 1 strongly prefer cultured meat over plant-based meat
- 2 somewhat prefer cultured meat over plant-based meat
- 3 somewhat prefer plant-based meat over cultured meat
- 4 strongly prefer plant-based meat over cultured meat
- 5 eat both
- 6 not eat either
- 97 Don't know/ Prefer not to say

#### ASK ALL. SINGLE

##### Q31. PREFERENCE OVER INSECT-BASED MEAT

Would you rather eat cultured meat than insect-based alternatives to meat?  
I would...

- 1 strongly prefer cultured meat over insect -based meat
- 2 somewhat prefer cultured meat over insect -based meat
- 3 somewhat prefer insect -based meat over cultured meat
- 4 strongly prefer insect -based meat over cultured meat
- 5 eat both
- 6 not eat either
- 97 Don't know/ Prefer not to say

#### ASK ALL. OPEN

##### Q32. THOUGHTS ON CULTURED MEAT

What kinds of thoughts do you have about cultured meat? (This includes unfinished thoughts, such as doubts, worries, hopes, mixed feelings...).

... [\[open\]](#)

#### ASK ALL. SINGLE

##### Q33. NAME PREFERENCE

Which name out of these options do you prefer for this meat that we mentioned earlier?

##### RANDOMIZE

##### GERMAN

- 1
- 2
- 3
- 4
- 5
- 6
- 7
- 8
- 9
- 10
- 11

97 Don't know/ Prefer not to say

##### FRENCH

- 1
- 2

- 3
- 4
- 5
- 6
- 7
- 8
- 9
- 10
- 11

97 Don't know/ Prefer not to say

## DEMOGRAPHIC QUESTIONS

### SHOW ALL.

Please answer a few questions about yourself to finish the questionnaire. (*country specific GDPR text included here*)

### ASK ALL.

#### D1. EDUCATION

What is the highest level of education you achieved?

#### GER

- 1 Keine Schulausbildung
- 2 Mittel-/ Real-/ Höhere-/ Fach-/ Handelsschule, ohne Abschluss
- 3 Mittel-/ Real-/ Höhere-/ Fach-/ Handelsschule
- 4 Höhere Schule/Gymnasium, ohne Abschluss
- 5 Abitur/ Hochschulreife
- 6 Hochschulausbildung, ohne Abschluss
- 7 Universitäts-/ Fachhochschulabschluss
- 97 Keine Angabe

#### FR

- 1 École Élémentaire
- 2 Collège (BREVET)
- 3 CAP, BEP
- 4 Baccalauréat
- 5 Bac + 2 (BTS, DEUG, DUT)
- 6 Bac +3/+4 (Licence, Maîtrise, Master 1)
- 7 Bac +5 et plus (Grandes Écoles, DESS, DEA, Doctorat, Master 2)
- 97 Je préfère ne pas répondre

### ASK ALL.

#### D2. EMPLOYMENT STATUS

Which of the following best describes your current situation?

#### SINGLE.

- 1 Employed - full time (32 or more hours weekly)
- 2 Employed - part time (15 to less than 32 hours weekly)
- 3 Employed - less than 15 hours
- 4 Unemployed



- 5 Helping family members (unpaid)
- 6 In vocational training
- 7 Student, in school
- 8 Retired
- 9 Doing housework, looking after children or other persons
- 10 In community or military service
- 11 Permanently sick or disabled
- 12 Other
- 97 Prefer not to say

ASK ALL.

### D3. WORK IN ANIMAL AGRICULTURE

Are you working in the animal agriculture or meat production industries (livestock farmer, butcher, slaughterhouse worker, breeder, cattle feed supplier, meat processor, BBQ restaurant...)?

- 1 Yes
- 2 No
- 97 Don't know/ Prefer not to answer

ASK ALL.

### D4. POLITICAL VIEWS

In politics, people sometimes speak about "left" and "right." Where would you place yourself on a scale from 1 to 10, with 1 meaning "very left" and 10 meaning "very right?"

- 1 Very left
- 2
- 3
- 4
- 5
- 6
- 7
- 8
- 9
- 10 Very right
- 97 Don't know/ Prefer not to say

ASK ALL.

### D5. INCOME

What is your monthly income?

- 1 Less than 1 000 euros
- 2 Between 1 000 euros and less than 2 000 euros
- 3 Between 2 000 euros and less than 3 000 euros
- 4 Between 3 000 euros and less than 4 000 euros
- 5 More than 4 000 euros
- 97 Don't know/ Prefer not to answer

SHOW ALL.

Thank you for your participation!
